# Supplementary material for: Comparative Genome Sequence Analysis Reveals the Extent of Diversity and Conservation for Glycan-Associated Proteins inBurkholderiaspp.
Source: Hindawi journal article supplement (doi:10.1155/2012/752867), 2012-01-01
Supplement: f1 [file 752867.f1.pdf]

## Additional Files

### Additional File 1 - List of all conserved *B. pseudomallei* glycan associated proteins in nine *Burkholderia* spp.

\* Proteins with homologs that are known essential genes

| GeneDB ID        | Description                                          | <i>B. mallei</i> ATCC 23344 | <i>B. thailandensis</i> E264 | <i>B. multivorans</i> ATCC 17616 | <i>B. ambifaria</i> MC40-6 | <i>B. vietnamiensis</i> G4 | <i>B. cenocepacia</i> J2315 | <i>B. xenovorans</i> LB400 | <i>B. phymatum</i> STM815 |
|------------------|------------------------------------------------------|-----------------------------|------------------------------|----------------------------------|----------------------------|----------------------------|-----------------------------|----------------------------|---------------------------|
| <b>BPSL0183*</b> | penicillin-binding protein                           | YP_101998.1                 | YP_440701.1                  | YP_001581291.1                   | YP_001809743.1             | YP_001121023.1             | YP_002229641.1              | YP_556651.1                | YP_001856290.1            |
| <b>BPSL0188*</b> | aspartyl/glutamyl-tRNA amidotransferase subunit A    | YP_102003.1                 | YP_440706.1                  | YP_001581286.1                   | YP_001809738.1             | YP_001121018.1             | YP_002229646.1              | YP_556656.1                | YP_001856295.1            |
| <b>BPSL0189*</b> | aspartyl/glutamyl-tRNA amidotransferase subunit B    | YP_102004.1                 | YP_440707.1                  | YP_001581285.1                   | YP_001809737.1             | YP_001121017.1             | YP_002229647.1              | YP_556657.1                | YP_001856296.1            |
| <b>BPSL0212*</b> | S-adenosylmethionine synthetase                      | YP_104736.1                 | YP_440732.1                  | YP_001581259.1                   | YP_001809684.1             | YP_001120992.1             | YP_002229670.1              | YP_556681.1                | YP_001856319.1            |
| <b>BPSL0262</b>  | putative transglycosylase                            | YP_104784.1                 | YP_440791.1                  | YP_001581210.1                   | YP_001809637.1             | YP_001120945.1             | YP_002229716.1              | YP_560785.1                | YP_001859118.1            |
| <b>BPSL0278</b>  | peptidoglycan hydrolase                              | YP_104803.2                 | YP_440806.1                  | YP_001581193.1                   | YP_001809619.1             | YP_001120928.1             | YP_002229733.1              | YP_560835.1                | YP_001859172.1            |
| <b>BPSL0312*</b> | D-fructose-6-phosphate amidotransferase              | YP_104837.1                 | YP_440846.1                  | YP_001580684.1                   | YP_001809584.1             | YP_001120896.1             | YP_002229771.1              | YP_560775.1                | YP_001859108.1            |
| <b>BPSL0374</b>  | metallo-beta-lactamase superfamily protein           | YP_101939.1                 | YP_440905.1                  | YP_001578572.1                   | YP_001809529.1             | YP_001120845.1             | YP_002229831.1              | YP_556801.1                | YP_001856421.1            |
| <b>BPSL0408</b>  | penicillin-binding protein 6                         | YP_101907.1                 | YP_440938.1                  | YP_001578603.1                   | YP_001809498.1             | YP_001120815.1             | YP_002229862.1              | YP_556834.1                | YP_001856451.1            |
| <b>BPSL0447*</b> | NAD(P)H-dependent glycerol-3-phosphate dehydrogenase | YP_104680.1                 | YP_440978.1                  | YP_001578642.1                   | YP_001809463.1             | YP_001120779.1             | YP_002229900.1              | YP_556875.1                | YP_001856509.1            |
| <b>BPSL0497</b>  | putative phosphosugar-binding protein                | YP_104649.1                 | YP_441006.1                  | YP_001578672.1                   | YP_001809434.1             | YP_001120753.1             | YP_002229936.1              | YP_556898.1                | YP_001856533.1            |
| <b>BPSL0521*</b> | ribose-phosphate pyrophosphokinase                   | YP_104604.1                 | YP_441032.1                  | YP_001578705.1                   | YP_001809413.1             | YP_001120733.1             | YP_002229957.1              | YP_556919.1                | YP_001856554.1            |
| <b>BPSL0545*</b> | excinuclease ABC subunit A                           | YP_104583.1                 | YP_441055.1                  | YP_001578728.1                   | YP_001809390.1             | YP_001120710.1             | YP_002229979.1              | YP_556943.1                | YP_001856578.1            |
| <b>BPSL0603</b>  | putative polysaccharide biosynthesis protein         | YP_101880.1                 | YP_441077.1                  | YP_001584375.1                   | YP_001810774.1             | YP_001117190.1             | YP_002233951.1              | YP_553083.1                | YP_001862798.1            |
| <b>BPSL0620</b>  | glycosyl transferase group 1 protein                 | YP_101897.1                 | YP_441094.1                  | YP_001584374.1                   | YP_001810781.1             | YP_001117211.1             | YP_002233952.1              | YP_557329.1                | YP_001862801.1            |
| <b>BPSL0667*</b> | glycyl-tRNA synthetase subunit beta                  | YP_102052.1                 | YP_441141.1                  | YP_001578789.1                   | YP_001809312.1             | YP_001120629.1             | YP_002230057.1              | YP_557038.1                | YP_001856644.1            |
| <b>BPSL0695</b>  | putative ATP-dependent RNA helicase 1                | YP_102079.1                 | YP_441164.1                  | YP_001578819.1                   | YP_001809288.1             | YP_001120608.1             | YP_002230087.1              | YP_560338.1                | YP_001856665.1            |

|                  |                                                     |             |             |                |                |                |                |             |                |
|------------------|-----------------------------------------------------|-------------|-------------|----------------|----------------|----------------|----------------|-------------|----------------|
| <b>BPSL0782</b>  | putative type 4 fimbrial pilin protein              | YP_102104.1 | YP_441205.1 | YP_001578848.1 | YP_001809260.1 | YP_001120583.1 | YP_002230113.1 | YP_560309.1 | YP_001856684.1 |
| <b>BPSL0791*</b> | Putative ADP-heptose--LPS heptosyltransferase II    | YP_102116.1 | YP_441214.1 | YP_001578857.1 | YP_001809246.1 | YP_001120574.1 | YP_002230121.1 | YP_560302.1 | YP_001856692.1 |
| <b>BPSL0798*</b> | fructose-1,6-bisphosphate aldolase                  | YP_102124.1 | YP_441221.1 | YP_001578864.1 | YP_001809239.1 | YP_001120567.1 | YP_002231941.1 | YP_560295.1 | YP_001856699.1 |
| <b>BPSL0844</b>  | putative ketopantoate reductase                     | YP_102166.1 | YP_441263.1 | YP_001578908.1 | YP_001809194.1 | YP_001117178.1 | YP_002231896.1 | YP_554561.1 | YP_001862257.1 |
| <b>BPSL0876*</b> | 3-deoxy-manno-octulosonate cytidyltransferase       | YP_103838.1 | YP_441296.1 | YP_001578941.1 | YP_001809159.1 | YP_001120467.1 | YP_002231863.1 | YP_560222.2 | YP_001856774.1 |
| <b>BPSL0878*</b> | tetraacyldisaccharide 4'-kinase                     | YP_103836.1 | YP_441298.1 | YP_001578943.1 | YP_001809157.1 | YP_001120465.1 | YP_002231861.1 | YP_560220.1 | YP_001856776.1 |
| <b>BPSL1044</b>  | alpha,alpha-trehalose-phosphate synthase            | YP_104512.1 | YP_441456.1 | YP_001579088.1 | YP_001808997.1 | YP_001120316.1 | YP_002231596.1 | YP_557663.1 | YP_001858366.1 |
| <b>BPSL1048</b>  | Putative sugar transport, integral membrane protein | YP_104515.1 | YP_441459.1 | YP_001579090.1 | YP_001808995.1 | YP_001120314.1 | YP_002231594.1 | YP_557664.1 | YP_001858364.1 |
| <b>BPSL1114</b>  | putative ATP-dependent RNA helicase 2               | YP_103512.1 | YP_441535.1 | YP_001579149.1 | YP_001808930.1 | YP_001120239.1 | YP_002231536.1 | YP_557740.1 | YP_001858306.1 |
| <b>BPSL1124</b>  | putative LPS biosynthesis-related protein           | YP_103500.1 | YP_441545.1 | YP_001579156.1 | YP_001808922.1 | YP_001120231.1 | YP_002231526.1 | YP_557744.1 | YP_001858302.1 |
| <b>BPSL1186</b>  | glucose-1-dehydrogenase                             | YP_103460.1 | YP_441589.1 | YP_001579191.1 | YP_001808886.1 | YP_001120194.1 | YP_002231493.1 | YP_557793.1 | YP_001858257.1 |
| <b>BPSL1190</b>  | putative glycosyltransferase                        | YP_103456.1 | YP_441593.1 | YP_001579195.1 | YP_001808882.1 | YP_001120190.1 | YP_002231489.1 | YP_557797.1 | YP_001858253.1 |
| <b>BPSL1209*</b> | triosephosphate isomerase                           | YP_103436.1 | YP_441612.1 | YP_001579214.1 | YP_001808863.1 | YP_001120170.1 | YP_002231470.1 | YP_557816.1 | YP_001858236.1 |
| <b>BPSL1345</b>  | putative exported transglycosylase protein          | YP_102529.1 | YP_443299.1 | YP_001580214.1 | YP_001807884.1 | YP_001119086.1 | YP_002230396.1 | YP_559751.1 | YP_001857106.1 |
| <b>BPSL1358*</b> | putative phosphoglucomutase                         | YP_102542.1 | YP_443286.1 | YP_001580203.1 | YP_001807895.1 | YP_001119097.1 | YP_002230407.1 | YP_559741.1 | YP_001857116.1 |
| <b>BPSL1402</b>  | trigger factor                                      | YP_103113.1 | YP_442641.1 | YP_001579533.1 | YP_001808541.1 | YP_001119694.1 | YP_002231124.1 | YP_558725.1 | YP_001857245.1 |
| <b>BPSL1404*</b> | ATP-dependent protease ATP-binding subunit          | YP_103111.1 | YP_442644.1 | YP_001579535.1 | YP_001808539.1 | YP_001119692.1 | YP_002231122.1 | YP_558727.1 | YP_001857247.1 |
| <b>BPSL1444</b>  | putative sugar transferase                          | YP_103072.1 | YP_442683.1 | YP_001579573.1 | YP_001808496.1 | YP_001119649.1 | YP_002231085.1 | YP_558767.1 | YP_001857285.1 |
| <b>BPSL1471</b>  | Putative polymixin resistance glucosyl transferase  | YP_103047.1 | YP_442713.1 | YP_001579598.1 | YP_001808471.1 | YP_001119626.1 | YP_002231060.1 | YP_558634.1 | YP_001857160.1 |
| <b>BPSL1472*</b> | putative LPS biosynthesis-related protein           | YP_103046.1 | YP_442714.1 | YP_001579599.1 | YP_001808470.1 | YP_001119625.1 | YP_002231059.1 | YP_558634.1 | YP_001857161.1 |
| <b>BPSL1484*</b> | ClpB heat-shock protein                             | YP_103036.1 | YP_442726.1 | YP_001579611.1 | YP_001808458.1 | YP_001119613.1 | YP_002231047.1 | YP_558648.1 | YP_001857173.1 |
| <b>BPSL1539</b>  | putative fructokinase-like protein                  | YP_102977.1 | YP_442781.1 | YP_001579674.1 | YP_001808396.1 | YP_001119551.1 | YP_002230982.1 | YP_558686.1 | YP_001857209.1 |
| <b>BPSL1575</b>  | putative sugar kinase                               | YP_102686.1 | YP_442817.1 | YP_001579711.1 | YP_001808357.1 | YP_001119516.1 | YP_002230931.1 | YP_559038.1 | YP_001857482.1 |
| <b>BPSL1909*</b> | alpha-ketoglutarate decarboxylase                   | YP_102751.1 | YP_443073.1 | YP_001579932.1 | YP_001808134.1 | YP_001119317.1 | YP_002230645.1 | YP_558203.1 | YP_001857949.1 |

|                  |                                                            |             |             |                |                |                |                |             |                |
|------------------|------------------------------------------------------------|-------------|-------------|----------------|----------------|----------------|----------------|-------------|----------------|
| <b>BPSL1918*</b> | translation initiation factor IF-2                         | YP_102760.1 | YP_443081.1 | YP_001579940.1 | YP_001808126.1 | YP_001119309.1 | YP_002230637.1 | YP_558195.1 | YP_001857957.1 |
| <b>BPSL1945*</b> | threonyl-tRNA synthetase                                   | YP_102787.1 | YP_443111.1 | YP_001579964.1 | YP_001808103.1 | YP_001119282.1 | YP_002230612.1 | YP_559634.1 | YP_001857786.1 |
| <b>BPSL1972</b>  | Putative antibiotic resistance membrane protein            | YP_102662.1 | YP_443140.1 | YP_001580050.1 | YP_001808074.1 | YP_001119254.1 | YP_002230587.1 | YP_559659.1 | YP_001857810.1 |
| <b>BPSL1981*</b> | UTP--glucose-1-phosphate uridylyltransferase               | YP_102653.1 | YP_443149.1 | YP_001580059.1 | YP_001808063.1 | YP_001119245.1 | YP_002230578.1 | YP_559671.1 | YP_001857820.1 |
| <b>BPSL1994</b>  | putative carbohydrate kinase                               | YP_102641.1 | YP_443162.1 | YP_001580076.1 | YP_001808046.1 | YP_001119230.1 | YP_002230561.1 | YP_559679.1 | YP_001857828.1 |
| <b>BPSL2104</b>  | putative penicillin-binding protein                        | YP_103141.1 | YP_442606.1 | YP_001579506.1 | YP_001808560.1 | YP_001119712.1 | YP_002231148.1 | YP_559056.1 | YP_001857497.1 |
| <b>BPSL2129</b>  | inositol-5-monophosphate dehydrogenase                     | YP_103165.1 | YP_442580.1 | YP_001579470.1 | YP_001808591.1 | YP_001119735.1 | YP_002231190.1 | YP_559301.1 | YP_001857542.1 |
| <b>BPSL2147*</b> | UDP-N-acetylglucosamine acyltransferase                    | YP_103183.1 | YP_442563.1 | YP_001579454.1 | YP_001808607.1 | YP_001119751.1 | YP_002231205.1 | YP_559313.1 | YP_001857554.1 |
| <b>BPSL2149*</b> | UDP-3-O-[3-hydroxymyristoyl] glucosamine N-acyltransferase | YP_103185.1 | YP_442561.1 | YP_001579452.1 | YP_001808609.1 | YP_001119753.1 | YP_002231207.1 | YP_559315.1 | YP_001857556.1 |
| <b>BPSL2153*</b> | 1-deoxy-D-xylulose 5-phosphate reductoisomerase            | YP_103189.1 | YP_442557.1 | YP_001579448.1 | YP_001808613.1 | YP_001119757.1 | YP_002231211.1 | YP_559319.1 | YP_001857560.1 |
| <b>BPSL2185</b>  | Family M22 non-peptidase homologue                         | YP_103222.1 | YP_442525.1 | YP_001579417.1 | YP_001808644.1 | YP_001119789.1 | YP_002231242.1 | YP_559353.1 | YP_001857593.1 |
| <b>BPSL2187</b>  | putative ATP-dependent RNA helicase                        | YP_103224.1 | YP_442523.1 | YP_001579415.1 | YP_001808646.1 | YP_001119791.1 | YP_002231244.1 | YP_559355.1 | YP_001857595.1 |
| <b>BPSL2197*</b> | glutamyl-tRNA synthetase                                   | YP_103237.1 | YP_442513.1 | YP_001579405.1 | YP_001808655.1 | YP_001119800.1 | YP_002231253.1 | YP_559365.1 | YP_001857605.1 |
| <b>BPSL2270*</b> | phosphopyruvate hydratase                                  | YP_103309.1 | YP_442424.1 | YP_001579350.1 | YP_001808714.1 | YP_001120023.1 | YP_002231306.1 | YP_559434.1 | YP_001857667.1 |
| <b>BPSL2281*</b> | lysyl-tRNA synthetase                                      | YP_103320.1 | YP_442413.1 | YP_001579339.1 | YP_001808725.1 | YP_001120034.1 | YP_002231317.1 | YP_559446.1 | YP_001857678.1 |
| <b>BPSL2399</b>  | putative glycosyltransferase                               | YP_102370.1 | YP_442298.1 | YP_001580316.1 | YP_001807759.1 | YP_001118935.1 | YP_002230198.1 | YP_554912.1 | YP_001857415.1 |
| <b>BPSL2408</b>  | glycosyl transferase group 1 protein                       | YP_102360.1 | YP_442289.1 | YP_001580327.1 | YP_001807749.1 | YP_001118924.1 | YP_002230188.1 | YP_559760.1 | YP_001857096.1 |
| <b>BPSL2507</b>  | cysteine synthase B                                        | YP_102231.2 | YP_442183.3 | YP_001580431.1 | YP_001807642.1 | YP_001118822.1 | YP_002232042.1 | YP_560009.1 | YP_001856989.1 |
| <b>BPSL2509*</b> | putative ADP-glycero-mannoheptose epimerase                | YP_102234.1 | YP_442181.1 | YP_001580433.1 | YP_001807640.1 | YP_001118820.1 | YP_002232044.1 | YP_560011.1 | YP_001856987.1 |
| <b>BPSL2510*</b> | putative ADP-heptose synthase                              | YP_102235.1 | YP_442180.1 | YP_001580434.1 | YP_001807639.1 | YP_001118819.1 | YP_002232045.1 | YP_560012.1 | YP_001856986.1 |
| <b>BPSL2511</b>  | putative UDP-glucose dehydrogenase                         | YP_102236.1 | YP_442179.1 | YP_001580435.1 | YP_001807638.1 | YP_001118818.1 | YP_002232046.1 | YP_560013.1 | YP_001856985.1 |
| <b>BPSL2547*</b> | fructose-1,6-bisphosphatase                                | YP_102278.1 | YP_442142.1 | YP_001580563.1 | YP_001807596.1 | YP_001118780.1 | YP_002232104.1 | YP_560077.1 | YP_001856920.1 |
| <b>BPSL2592</b>  | lipopolysaccharide heptosyltransferase-1                   | YP_103680.1 | YP_442116.1 | YP_001580592.1 | YP_001807568.1 | YP_001118752.1 | YP_002232132.1 | YP_557616.1 | YP_001856897.1 |
| <b>BPSL2611</b>  | maltose-binding protein                                    | YP_103699.1 | YP_442097.1 | YP_001580612.1 | YP_001807547.1 | YP_001118730.1 | YP_002232151.1 | YP_557586.1 | YP_001856864.1 |

|                  |                                                                            |             |             |                |                |                |                |             |                |
|------------------|----------------------------------------------------------------------------|-------------|-------------|----------------|----------------|----------------|----------------|-------------|----------------|
| <b>BPSL2614</b>  | glucokinase                                                                | YP_103702.1 | YP_442094.1 | YP_001580615.1 | YP_001807544.1 | YP_001118727.1 | YP_002232154.1 | YP_557583.1 | YP_001856861.1 |
| <b>BPSL2663*</b> | 3-deoxy-D-manno-octulosonic-acid transferase                               | YP_103754.1 | YP_442038.1 | YP_001580675.1 | YP_001807498.1 | YP_001118676.1 | YP_002232221.1 | YP_557343.1 | YP_001858485.1 |
| <b>BPSL2665</b>  | lipopolysaccharide heptosyltransferase-1                                   | YP_103756.1 | YP_442036.1 | YP_001580677.1 | YP_001807496.1 | YP_001118674.1 | YP_002232223.1 | YP_557341.1 | YP_001858487.1 |
| <b>BPSL2666</b>  | phosphoglucomutase                                                         | YP_102542.1 | YP_442035.1 | YP_001580678.1 | YP_001807495.1 | YP_001118673.1 | YP_002232224.1 | YP_557340.1 | YP_001858488.1 |
| <b>BPSL2667</b>  | Putative lipopolysaccharide biosynthesis protein                           | YP_103758.1 | YP_442034.1 | YP_001580679.1 | YP_001807494.1 | YP_001118672.1 | YP_002232225.1 | YP_557339.1 | YP_001858489.1 |
| <b>BPSL2668</b>  | putative glycosyl transferase                                              | YP_103759.1 | YP_442033.1 | YP_001580680.1 | YP_001807493.1 | YP_001118671.1 | YP_002232226.1 | YP_557338.1 | YP_001858490.1 |
| <b>BPSL2669</b>  | putative glycosyl transferase                                              | YP_103760.1 | YP_442032.1 | YP_001580681.1 | YP_001807492.1 | YP_001118670.1 | YP_002232227.1 | YP_557337.1 | YP_001858491.1 |
| <b>BPSL2670*</b> | UDP-glucose 4-epimerase                                                    | YP_103761.1 | YP_442031.1 | YP_001580682.1 | YP_001807491.1 | YP_001118669.1 | YP_002232228.1 | YP_557336.1 | YP_001858492.1 |
| <b>BPSL2671</b>  | putative undecaprenyl phosphate N-acetylglucosaminyltransferase            | YP_103762.1 | YP_442030.1 | YP_001580683.1 | YP_001807490.1 | YP_001118668.1 | YP_002232229.1 | YP_557309.1 | YP_001858509.1 |
| <b>BPSL2672</b>  | Putative epimerase/dehydratase polysaccharide-related biosynthesis protein | YP_103564.1 | YP_442029.1 | YP_001580685.1 | YP_001807488.1 | YP_001118667.1 | YP_002232230.1 | YP_557270.1 | YP_001858510.1 |
| <b>BPSL2681</b>  | ABC transporter, ATP-binding component                                     | YP_103572.1 | YP_442020.1 | YP_001580696.1 | YP_001807479.1 | YP_001121037.1 | YP_002232239.1 | YP_557252.1 | YP_001858534.1 |
| <b>BPSL2682</b>  | putative ABC transporter, membrane permease                                | YP_103573.1 | YP_442019.1 | YP_001580697.1 | YP_001807478.1 | YP_001118663.1 | YP_002232240.1 | YP_557251.1 | YP_001858535.1 |
| <b>BPSL2683</b>  | dTDP-4-dehydrorhamnose reductase                                           | YP_103574.1 | YP_442018.1 | YP_001580780.1 | YP_001807476.1 | YP_001118655.1 | YP_002232241.1 | YP_557248.1 | YP_001858537.1 |
| <b>BPSL2684</b>  | dTDP-6-deoxy-D-glucose-3,5 epimerase                                       | YP_103575.1 | YP_442017.1 | YP_001580779.1 | YP_001807475.1 | YP_001118654.1 | YP_002232242.1 | YP_557250.1 | YP_001858538.1 |
| <b>BPSL2685*</b> | glucose-1-phosphate thymidyltransferase                                    | YP_103576.1 | YP_442016.1 | YP_001580778.1 | YP_001807474.1 | YP_001118653.1 | YP_002232243.1 | YP_553601.1 | YP_001858539.1 |
| <b>BPSL2686*</b> | dTDP-glucose 4,6-dehydratase                                               | YP_103577.1 | YP_442015.1 | YP_001580777.1 | YP_001807473.1 | YP_001118652.1 | YP_002232244.1 | YP_557247.1 | YP_001858540.1 |
| <b>BPSL2697*</b> | chaperonin GroEL                                                           | YP_103588.1 | YP_442004.1 | YP_001580709.1 | YP_001807462.1 | YP_001118641.1 | YP_002232255.1 | YP_557235.1 | YP_001858554.1 |
| <b>BPSL2826*</b> | putative DnaJ chaperone protein                                            | YP_103884.1 | YP_441856.1 | YP_001580813.1 | YP_001807382.1 | YP_001118560.1 | YP_002232373.1 | YP_557091.1 | YP_001858715.1 |
| <b>BPSL2827*</b> | molecular chaperone DnaK                                                   | YP_103885.1 | YP_441855.1 | YP_001580814.1 | YP_001807381.1 | YP_001118559.1 | YP_002232374.1 | YP_557090.1 | YP_001858716.1 |
| <b>BPSL2844</b>  | glycolate oxidase FAD binding subunit                                      | YP_103966.1 | YP_441837.1 | YP_001580834.1 | YP_001807362.1 | YP_001118541.1 | YP_002232393.1 | YP_557072.1 | YP_001858733.1 |
| <b>BPSL2952*</b> | glyceraldehyde 3-phosphate dehydrogenase 1                                 | YP_104014.1 | YP_441743.1 | YP_001580928.1 | YP_001807276.1 | YP_001118459.1 | YP_002232490.1 | YP_560419.1 | YP_001858816.1 |
| <b>BPSL2967*</b> | L-arabinose transporter ATP-binding protein                                | YP_104031.1 | YP_441727.1 | YP_001580944.1 | YP_001807260.1 | YP_001118444.1 | YP_002232506.1 | YP_560438.1 | YP_001858832.1 |
| <b>BPSL2968</b>  | Putative L-arabinose transport                                             | YP_104032.1 | YP_441726.1 | YP_001580945.1 | YP_001807259.1 | YP_001118443.1 | YP_002232507.1 | YP_560439.1 | YP_001858833.1 |

|                  | system, exported protein                                           |             |             |                |                |                |                |             |                |
|------------------|--------------------------------------------------------------------|-------------|-------------|----------------|----------------|----------------|----------------|-------------|----------------|
| <b>BPSL2975*</b> | Monofunctional biosynthetic peptidoglycan transglycosylase         | YP_104039.1 | YP_441719.1 | YP_001580952.1 | YP_001807252.1 | YP_001118435.1 | YP_002232514.1 | YP_560445.1 | YP_001858839.1 |
| <b>BPSL2988</b>  | putative sugar kinase                                              | YP_104052.1 | YP_441705.1 | YP_001580965.1 | YP_001807239.1 | YP_001118422.1 | YP_002232527.1 | YP_560458.1 | YP_001858852.1 |
| <b>BPSL3025*</b> | N-acetylglucosaminyl transferase                                   | YP_104094.1 | YP_441666.1 | YP_001581017.1 | YP_001807201.1 | YP_001118382.1 | YP_002232564.1 | YP_560499.1 | YP_001858891.1 |
| <b>BPSL3030*</b> | UDP-N-acetylmuramoylalanyl-D-glutamate--2,6-diaminopimelate ligase | YP_104099.1 | YP_441661.1 | YP_001581022.1 | YP_001807196.1 | YP_001118377.1 | YP_002232569.1 | YP_560504.1 | YP_001858896.1 |
| <b>BPSL3031*</b> | peptidoglycan synthetase FtsI                                      | YP_104100.1 | YP_441660.1 | YP_001581023.1 | YP_001807195.1 | YP_001118376.1 | YP_002232570.1 | YP_560505.1 | YP_001858897.1 |
| <b>BPSL3141*</b> | UDP-N-acetylglucosamine 1-carboxyvinyltransferase                  | YP_104237.1 | YP_443499.1 | YP_001578518.1 | YP_001807067.1 | YP_001118249.1 | YP_002229476.1 | YP_560589.1 | YP_001858979.1 |
| <b>BPSL3215*</b> | elongation factor Tu                                               | YP_104181.1 | YP_443587.1 | YP_001578426.1 | YP_001806978.1 | YP_001118176.1 | YP_002229399.1 | YP_560673.1 | YP_001859060.1 |
| <b>BPSL3220*</b> | DNA-directed RNA polymerase subunit beta'                          | YP_104174.1 | YP_443579.1 | YP_001578434.1 | YP_001806986.1 | YP_001118171.1 | YP_002229394.1 | YP_560678.1 | YP_001859065.1 |
| <b>BPSL3228</b>  | elongation factor Tu                                               | YP_104168.1 | YP_443574.1 | YP_001578426.1 | YP_001806991.1 | YP_001118163.1 | YP_002229386.1 | YP_560686.1 | YP_001859073.1 |
| <b>BPSL3273</b>  | putative phosphosugar isomerase                                    | YP_104316.1 | YP_443641.1 | YP_001578390.1 | YP_001806934.1 | YP_001118100.1 | YP_002229327.1 | YP_556740.1 | YP_001856364.1 |
| <b>BPSL3312</b>  | putative glycosyltransferase                                       | YP_104376.1 | YP_443682.1 | YP_001578351.1 | YP_001806893.1 | YP_001118059.1 | YP_002229289.1 | YP_560870.1 | YP_001859196.1 |
| <b>BPSL3319</b>  | flagellin                                                          | YP_104383.1 | YP_443690.1 | YP_001578343.1 | YP_001806886.1 | YP_001118051.1 | YP_002229280.1 | YP_560880.1 | YP_001859205.1 |
| <b>BPSS0058</b>  | excinuclease ABC subunit A                                         | YP_104914.1 | YP_438277.1 | YP_001585503.1 | YP_001815935.1 | YP_001115649.1 | YP_002153630.1 | YP_558030.1 | YP_001857777.1 |
| <b>BPSS0145*</b> | ATP-dependent RNA helicase DbpA                                    | YP_106468.1 | YP_438416.2 | YP_001585202.1 | YP_001809938.1 | YP_001116350.1 | YP_002232805.1 | YP_556617.1 | YP_001856255.1 |
| <b>BPSS0218</b>  | isomerase                                                          | YP_106403.1 | YP_440365.1 | YP_001583270.1 | YP_001812039.1 | YP_001116121.1 | YP_002235289.1 | YP_552396.1 | YP_001860469.1 |
| <b>BPSS0327</b>  | sugar transport-related, membrane protein                          | YP_106030.1 | YP_440260.1 | YP_001583389.1 | YP_001811859.1 | YP_001116009.1 | YP_002235110.1 | YP_554433.1 | YP_001860820.1 |
| <b>BPSS0342*</b> | sugar transport-related, membrane protein                          | YP_105552.1 | YP_440244.1 | YP_001583397.1 | YP_001811852.1 | YP_001116002.1 | YP_002235103.1 | YP_554419.1 | YP_001862670.1 |
| <b>BPSS0817</b>  | Hypothetical protein macroglobulin                                 | YP_105428.1 | YP_439778.1 | YP_001584065.1 | YP_001811116.1 | YP_001117502.1 | YP_002234349.1 | YP_552770.1 | YP_001857177.1 |
| <b>BPSS1219*</b> | penicillin-binding protein                                         | YP_105722.1 | YP_439393.1 | YP_001584350.1 | YP_001810804.1 | YP_001117219.1 | YP_002233977.1 | YP_553098.1 | YP_001860001.1 |
| <b>BPSS1577</b>  | Putative cellulose synthase catalytic subunit [UDP-forming]        | YP_106168.1 | YP_438994.1 | YP_001580105.1 | YP_001808003.1 | YP_001119200.1 | YP_002230524.1 | YP_553295.1 | YP_001859460.1 |
| <b>BPSS1580</b>  | cellulose biosynthesis protein                                     | YP_106171.1 | YP_438990.1 | YP_001580108.1 | YP_001807999.1 | YP_001119196.1 | YP_002230520.1 | YP_553292.1 | YP_001859457.1 |
| <b>BPSS1682*</b> | UTP-glucose-1-phosphate uridylyltransferase                        | YP_106267.1 | YP_438898.1 | YP_001584575.1 | YP_001810553.1 | YP_001116909.1 | YP_002233628.1 | YP_558796.1 | YP_001857312.1 |

|                  |                                                                      |             |             |                |                |                |                |             |                |
|------------------|----------------------------------------------------------------------|-------------|-------------|----------------|----------------|----------------|----------------|-------------|----------------|
| <b>BPSS1684</b>  | Putative lipopolysaccharide biosynthesis-related glycosyltransferase | YP_106269.1 | YP_438894.1 | YP_001584578.1 | YP_001810550.1 | YP_001116906.1 | YP_002233626.1 | YP_558793.1 | YP_001857309.1 |
| <b>BPSS1685</b>  | Putative lipopolysaccharide biosynthesis related membrane protein    | YP_106270.1 | YP_438893.1 | YP_001584579.1 | YP_001810549.1 | YP_001116905.1 | YP_002233625.1 | YP_558792.1 | YP_001857308.1 |
| <b>BPSS1688</b>  | GCP-mannose 4,6-dehydratase                                          | YP_106273.1 | YP_438889.1 | YP_001584582.1 | YP_001810546.1 | YP_001116902.1 | YP_002233622.1 | YP_558787.1 | YP_001857304.1 |
| <b>BPSS1689</b>  | UDP-glucose 4-epimerase                                              | YP_106274.1 | YP_438888.1 | YP_001584583.1 | YP_001810545.1 | YP_001116901.1 | YP_002233621.1 | YP_557246.1 | YP_001858541.1 |
| <b>BPSS1760*</b> | O-sialoglycoprotein endopeptidase                                    | YP_105141.1 | YP_438816.1 | YP_001584781.1 | YP_001810461.1 | YP_001116704.1 | YP_002233531.1 | YP_552520.1 | YP_001860115.1 |
| <b>BPSS2165</b>  | hypothetical protein BPSS2165                                        | YP_106481.1 | YP_440429.1 | YP_001583233.1 | YP_001812080.1 | P_001116163.1  | YP_002235335.1 | YP_555253.1 | YP_001860293.1 |
| <b>BPSS2167</b>  | glycosyl transferase                                                 | YP_106483.1 | YP_440430.1 | YP_001583231.1 | YP_001812082.1 | YP_001116165.1 | YP_002235337.1 | YP_555254.1 | YP_001860296.1 |
| <b>BPSS2304*</b> | penicillin-binding protein                                           | YP_106567.1 | YP_440511.1 | YP_001584232.1 | YP_001810924.1 | YP_001117313.1 | YP_002234102.1 | YP_558824.1 | YP_001860073.1 |
| <b>BPSL2930</b>  | Putative gluconate permease                                          | YP_103991.1 | YP_441766.1 | YP_001580902.1 | YP_001807296.1 | YP_001118477.1 | YP_002232467.1 | YP_560394.1 | YP_001858796.1 |
| <b>BPSS1762*</b> | 1-deoxy-D-xylulose-5-phosphate synthase                              | YP_105137.1 | YP_438814.1 | YP_001584783.1 | YP_001810459.1 | YP_001116702.1 | YP_002233529.1 | YP_552518.1 | YP_001860117.1 |
| <b>BPSL2843</b>  | Putative glycolate oxidase subunit GlcD                              | YP_103967.1 | YP_441838.1 | YP_001580833.1 | YP_001807363.1 | YP_001118542.1 | YP_002232392.1 | YP_557073.1 | YP_001858732.1 |
| <b>BPSL0839</b>  | Putative carbohydrate kinase                                         | YP_102161.1 | YP_441258.1 | YP_001578903.1 | YP_001809199.1 | YP_001120529.1 | YP_002231901.1 | YP_560257.1 | YP_001856735.1 |
| <b>BPSL0264</b>  | Putative uncharacterized protein                                     | YP_104786.1 | YP_440793.1 | YP_001581208.1 | YP_001809635.1 | YP_001120943.1 | YP_002229718.1 | YP_560783.1 | YP_001859116.1 |
| <b>BPSL2410</b>  | Alpha,alpha-trehalose-phosphate synthase                             | YP_102358.1 | YP_442285.1 | YP_001580329.1 | YP_001807747.1 | YP_001118922.1 | YP_002230184.1 | YP_559763.1 | YP_001857094.1 |
| <b>BPSL0538</b>  | Putative uncharacterized protein                                     | YP_104589.1 | YP_441048.1 | YP_001578721.1 | YP_001809397.1 | YP_001120717.1 | YP_002229972.1 | YP_556935.1 | YP_001856570.1 |
| <b>BPSL2118</b>  | Putative uncharacterized protein                                     | YP_103151.1 | YP_442591.1 | YP_001579492.1 | YP_001808576.1 | YP_001119726.1 | YP_002231167.1 | YP_559091.1 | YP_001857528.1 |
| <b>BPSL2012*</b> | GlutaminyI-tRNA synthetase                                           | YP_102623.1 | YP_443180.1 | YP_001580094.1 | YP_001808022.1 | YP_001119213.1 | YP_002230543.1 | YP_559698.1 | YP_001857142.1 |
| <b>BPSL0313*</b> | Bifunctional protein glmU                                            | YP_104838.1 | YP_440847.1 | YP_001581157.1 | YP_001809583.1 | YP_001120895.1 | YP_002229772.1 | YP_560776.1 | YP_001859109.1 |
| <b>BPSL1115*</b> | Glutamyl-Q tRNA(Asp) synthetase                                      | YP_103510.1 | YP_441536.1 | YP_001579150.1 | YP_001808929.1 | YP_001120238.1 | YP_002231535.1 | YP_557741.1 | YP_001858305.1 |
| <b>BPSS0545</b>  | Glutathione-independent formaldehyde dehydrogenase                   | YP_105240.1 | YP_440064.1 | YP_001583515.1 | YP_001811689.1 | YP_001115881.1 | YP_002234932.1 | YP_553725.1 | YP_001859509.1 |
| <b>BPSL0656</b>  | Putative nucleotidyl transferase                                     | YP_102041.1 | YP_441130.1 | YP_001578778.1 | YP_001809324.1 | YP_001120640.1 | YP_002230046.1 | YP_557025.1 | YP_001856633.1 |
| <b>BPSS0509</b>  | Putative uncharacterized protein                                     | YP_106327.1 | YP_440102.1 | YP_001584442.1 | YP_001810697.1 | YP_001117110.1 | YP_002233861.1 | YP_553101.1 | YP_001859999.1 |
| <b>BPSL1367*</b> | Putative exopolyphosphatase                                          | YP_102551.1 | YP_443277.1 | YP_001580194.1 | YP_001807904.1 | YP_001119106.1 | YP_002230416.1 | YP_559731.1 | YP_001857124.1 |

|                  |                                                                    |             |             |                |                |                |                |             |                |
|------------------|--------------------------------------------------------------------|-------------|-------------|----------------|----------------|----------------|----------------|-------------|----------------|
| <b>BPSL2315</b>  | Endonuclease/exonuclease/phosphatase family protein                | YP_103357.1 | YP_442378.1 | YP_001579313.1 | YP_001808752.1 | YP_001120061.1 | YP_002231346.1 | YP_559480.1 | YP_001857706.1 |
| <b>BPSS0882</b>  | Putative uncharacterized protein                                   | YP_105966.1 | YP_439711.1 | YP_001583918.1 | YP_001811258.1 | YP_001117684.1 | YP_002234534.1 | YP_553640.1 | YP_001859445.1 |
| <b>BPSL1413*</b> | Glucose-6-phosphate isomerase                                      | YP_103101.1 | YP_442653.1 | YP_001579542.1 | YP_001808534.1 | YP_001119687.1 | YP_002231117.1 | YP_558734.1 | YP_001857254.1 |
| <b>BPSS1424</b>  | Putative AraC transcriptional regulatory protein                   | YP_105327.1 | YP_439165.1 | YP_001583463.1 | YP_001811752.1 | YP_001115923.1 | YP_002235010.1 | YP_553700.1 | YP_001859647.1 |
| <b>BPSL2608*</b> | ABC transporter, ATP-binding component                             | YP_103697.1 | YP_442100.1 | YP_001580609.1 | YP_001807550.1 | YP_00111873.3  | YP_002232148.1 | YP_557589.1 | YP_001856867.1 |
| <b>BPSL2966</b>  | L-arabinose transport system, permease protein                     | YP_104030.1 | YP_441728.1 | YP_001580943.1 | YP_001807261.1 | YP_001118445.1 | YP_002232505.1 | YP_560437.1 | YP_001858831.1 |
| <b>BPSS1581</b>  | Endoglucanase                                                      | YP_106172.2 | YP_438989.1 | YP_001580109.1 | YP_001807998.1 | YP_001119195.1 | YP_002230519.1 | YP_553293.1 | YP_001859458.1 |
| <b>BPSL2630</b>  | Putative lipoprotein                                               | YP_103719.1 | YP_442072.1 | YP_001580626.1 | YP_001807532.1 | YP_001118717.1 | YP_002232167.1 | YP_560108.1 | YP_001856851.1 |
| <b>BPSL0829</b>  | Putative periplasmic ABC transporter substrate-binding component   | YP_102152.1 | YP_441251.1 | YP_001578894.1 | YP_001809205.1 | YP_001120535.1 | YP_002231910.1 | YP_560266.1 | YP_001856728.1 |
| <b>BPSL0509</b>  | Glycosyl transferase family protein                                | YP_104617.1 | YP_441019.1 | YP_001578682.1 | YP_001809422.1 | YP_001120742.1 | YP_002229948.1 | YP_556909.1 | YP_001856544.1 |
| <b>BPSL2411</b>  | Putative trehalose-phosphatase                                     | YP_102357.1 | YP_442284.1 | YP_001580330.1 | YP_001807746.1 | YP_001118921.1 | YP_002230183.1 | YP_559764.1 | YP_001857093.1 |
| <b>BPSL0699</b>  | Putative galactonate dehydratase protein                           | YP_102085.1 | YP_441168.3 | YP_001578823.1 | YP_001809284.1 | YP_001120604.1 | YP_002230091.1 | YP_560330.1 | YP_001856672.1 |
| <b>BPSL2609</b>  | ABC transporter, membrane permease                                 | YP_103698.1 | YP_442099.1 | YP_001580610.1 | YP_001807549.1 | YP_001118732.1 | YP_002232149.1 | YP_557588.1 | YP_001856866.1 |
| <b>BPSS1582</b>  | Cyclic di-GMP binding protein                                      | YP_106173.2 | YP_438988.2 | YP_001580110.1 | YP_001807997.1 | YP_001119194.1 | YP_002230518.1 | YP_553294.1 | YP_001859459.1 |
| <b>BPSL3419</b>  | Putative GMC oxidoreductase                                        | YP_104440.1 | YP_443824.1 | YP_001578274.1 | YP_001806802.1 | YP_001117950.1 | YP_002229178.1 | YP_560963.1 | YP_001859265.1 |
| <b>BPSL0312</b>  | Glucosamine--fructose-6-phosphate aminotransferase [isomerizing] 1 | YP_104837.1 | YP_440846.1 | YP_001581158.1 | YP_001809584.1 | YP_001120896.1 | YP_002229771.1 | YP_560775.1 | YP_001859108.1 |
| <b>BPSL3048*</b> | Putative ribulose-phosphate 3-epimerase                            | YP_105303.1 | YP_443414.1 | YP_001581039.1 | YP_001807178.1 | YP_001118360.1 | YP_002229567.1 | YP_560522.1 | YP_001858914.1 |
| <b>BPSL1158*</b> | Ribonuclease G                                                     | YP_103487.1 | YP_441562.1 | YP_001579165.1 | YP_001808913.1 | YP_001120220.1 | YP_002231519.1 | YP_557767.1 | YP_001858295.1 |
| <b>BPSL0321</b>  | Putative uncharacterized protein                                   | YP_104845.1 | YP_440857.1 | YP_001581149.1 | YP_001809575.1 | YP_001120887.1 | YP_002229779.1 | YP_556766.1 | YP_001856388.1 |
| <b>BPSS1714</b>  | Putative AraC-family transcriptional regulator                     | YP_106302.1 | YP_438865.1 | YP_001584612.1 | YP_001810516.1 | YP_001116847.1 | YP_002233591.1 | YP_558828.1 | YP_001862407.1 |
| <b>BPSL2424</b>  | Putative beta-hexosaminidase                                       | YP_102344.1 | YP_442270.1 | YP_001580347.1 | YP_001807726.1 | YP_001118904.1 | YP_002231960.1 | YP_559908.1 | YP_001857081.1 |
| <b>BPSL0496</b>  | Putative N-acetylglucosamine-                                      | YP_104648.1 | YP_441005.1 | YP_001578671.1 | YP_001809435.1 | YP_001120754.1 | YP_002229935.1 | YP_556897.1 | YP_001856532.1 |

|                  |                                                                 |             |             |                |                |                |                |             |                |
|------------------|-----------------------------------------------------------------|-------------|-------------|----------------|----------------|----------------|----------------|-------------|----------------|
|                  | 6-phosphate deacetylase                                         |             |             |                |                |                |                |             |                |
| <b>BPSL1844</b>  | Nod factor export ATP-binding protein I                         | YP_102897.1 | YP_443006.1 | YP_001579826.1 | YP_001808215.1 | YP_001119390.1 | YP_002230775.1 | YP_558550.1 | YP_001857862.1 |
| <b>BPSL1871*</b> | Ribose-5-phosphate isomerase A                                  | YP_102931.1 | YP_443035.1 | YP_001579868.1 | YP_001808174.1 | YP_001119355.1 | YP_002230686.1 | YP_558486.1 | YP_001857921.1 |
| <b>BPSL2977</b>  | Putative exoribonuclease II                                     | YP_104041.1 | YP_441717.1 | YP_001580954.1 | YP_001807250.1 | YP_001118433.1 | YP_002232516.1 | YP_56044.7  | YP_001858841.1 |
| <b>BPSL2195</b>  | Putative AraC-family transcriptional regulator                  | YP_103234.1 | YP_442515.1 | YP_001579407.1 | YP_001808653.1 | YP_001119798.1 | YP_002231251.1 | YP_559363.1 | YP_001857603.1 |
| <b>BPSS0872</b>  | AraC family regulatory protein                                  | YP_102055.1 | YP_560360.1 | YP_001578793.1 | YP_001809308.1 | YP_001120625.1 | YP_002230061.1 | YP_560360.1 | YP_001856647.1 |
| <b>BPSL1282</b>  | Putative exodeoxyribonuclease V gamma chain                     | YP_103385.1 | YP_443364.1 | YP_001580271.1 | YP_001807804.1 | YP_001118970.1 | YP_002230243.1 | YP_558176.1 | YP_001857977.1 |
| <b>BPSL2971</b>  | Putative galactonokinase                                        | YP_104035.1 | YP_441723.1 | YP_001580948.1 | YP_001807256.1 | YP_001118440.1 | YP_002232510.1 | YP_560442.1 | YP_001858836.1 |
| <b>BPSL1107</b>  | Putative uncharacterized protein                                | YP_103521.1 | YP_441528.1 | YP_001579142.1 | YP_001808937.1 | YP_001120246.1 | YP_002231543.1 | YP_557728.1 | YP_001858317.1 |
| <b>BPSL2613</b>  | 6-phosphogluconolactonase                                       | YP_103701.1 | YP_442095.1 | YP_001580614.1 | YP_001807545.1 | YP_001118728.1 | YP_002232153.1 | YP_557584.1 | YP_001856862.1 |
| <b>BPSL2964</b>  | Putative epimerase                                              | YP_104028.1 | YP_441730.1 | YP_001580941.1 | YP_001807263.1 | YP_001118447.1 | YP_002232503.1 | YP_560434.1 | YP_001858828.1 |
| <b>BPSL1342*</b> | Ribonuclease H                                                  | YP_102526.1 | YP_443302.1 | YP_001580217.1 | YP_001807881.1 | YP_001119083.1 | YP_002230393.1 | YP_559754.1 | YP_001857103.1 |
| <b>BPSS0776</b>  | Putative uncharacterized protein                                | YP_105378.1 | YP_439819.1 | YP_001583185.1 | YP_001812133.1 | YP_001116287.1 | YP_002235395.1 | YP_560435.1 | YP_001858829.1 |
| <b>BPSL0076</b>  | Ribonuclease P protein component                                | YP_104856.1 | YP_443731.1 | YP_001581337.1 | YP_001809792.1 | YP_001121136.1 | YP_002229587.1 | YP_561019.1 | YP_001859314.1 |
| <b>BPSS1864</b>  | Putative AraC-family regulatory protein                         | YP_105054.1 | YP_438713.1 | YP_001578832.1 | YP_001809271.1 | YP_001120597.1 | YP_002230099.1 | YP_559963.1 | YP_001857028.1 |
| <b>BPSL0438</b>  | Sugar transport PTS system IIa component                        | YP_104689.1 | YP_440969.1 | YP_001578633.1 | YP_001809472.1 | YP_001120788.1 | YP_002229891.1 | YP_556866.1 | YP_001856499.1 |
| <b>BPSL2673</b>  | Putative undecaprenyl phosphate N-acetylglucosaminyltransferase | YP_103565.1 | YP_442028.1 | YP_001580686.1 | YP_001807487.1 | YP_001118666.1 | YP_002232231.1 | YP_557269.1 | YP_001858511.1 |
| <b>BPSL1304*</b> | Putative LacI-family transcriptional regulator                  | YP_104561.1 | YP_443340.1 | YP_001580255.1 | YP_001807824.1 | YP_001118989.1 | YP_002230264.1 | YP_559537.1 | YP_001857728.1 |
| <b>BPSL3368</b>  | Putative AraC-family transcriptional regulator                  | YP_104490.1 | YP_443742.1 | YP_001578326.1 | YP_001806854.1 | YP_001118000.1 | YP_002229230.1 | YP_556613.1 | YP_001856253.1 |
| <b>BPSL3408*</b> | Glucose-inhibited division protein A                            | YP_104449.1 | YP_443812.1 | YP_001578285.1 | YP_001806812.1 | YP_001117960.1 | YP_002229188.1 | YP_560951.1 | YP_001859255.1 |
| <b>BPSL2145*</b> | Ribonuclease HII                                                | YP_103181.1 | YP_442565.1 | YP_001579456.1 | YP_001808605.1 | YP_001119749.1 | YP_002231203.1 | YP_559311.1 | YP_001857552.1 |
| <b>BPSL2452*</b> | Putative ribonuclease E                                         | YP_102317.1 | YP_442242.1 | YP_001580375.1 | YP_001807698.1 | YP_001118876.1 | YP_002231988.1 | YP_559937.1 | YP_001857053.1 |
| <b>BPSS1578</b>  | Putative exported protein                                       | YP_106169.1 | YP_438993.1 | YP_001580106.1 | YP_001808002.1 | YP_001115655.1 | YP_002230523.1 | YP_553296.1 | YP_001859461.1 |



**Additional File 2** - Calculation of G+C content in *B. pseudomallei* 96243, *B. ambifaria* MC40-6 and *B. cenocepacia* J2315.

a) Gene clusters in *B. pseudomallei* 96243

| GeneDB ID      | Protein names                             | Length(bp)  | GC content (%) |
|----------------|-------------------------------------------|-------------|----------------|
| BPSS2080       | hypothetical protein                      | 2034        | 46.95          |
| BPSS2081       | alpha-galactosidase                       | 2172        | 57.73          |
| BPSS2082       | ABC transporter system permease           | 852         | 53.63          |
| BPSS2083       | ABC transporter, permease protein         | 954         | 54.93          |
| BPSS2084       | extracellular solute-binding protein      | 1242        | 53.3           |
|                | ABC transport system, ATP-binding protein | 1245        | 58.15          |
| BPSS2086       | hypothetical protein                      | 2061        | 57.35          |
| BPSS2087       | LacI family regulatory protein            | 1059        | 57.51          |
| <b>Average</b> |                                           | <b>1452</b> | <b>54.94</b>   |

b) Gene clusters in *B. ambifaria* MC40-6

| GeneDB ID      | Protein names                                                        | Length(bp)  | GC content (%) |
|----------------|----------------------------------------------------------------------|-------------|----------------|
| BamMC406_6026  | binding-protein-dependent transport systems inner membrane component | 852         | 67.25          |
| BamMC406_6027  | Beta-galactosidase                                                   | 1971        | 69.96          |
| BamMC406_6028  | major facilitator transporter                                        | 1296        | 72.07          |
| BamMC406_6029  | arabinogalactan endo-1,4-beta-galactosidase                          | 1173        | 67.52          |
| BamMC406_6030  | aldose 1-epimerase                                                   | 1089        | 68.78          |
| BamMC406_6031  | AraC family transcriptional regulator                                | 1194        | 68.01          |
| BamMC406_6032  | xylose isomerase                                                     | 1323        | 66.97          |
| BamMC406_6033  | xylulokinase                                                         | 1479        | 72.35          |
| <b>Average</b> |                                                                      | <b>1297</b> | <b>69.11</b>   |

c) Gene clusters in *B. cenocepacia* J2315

| GeneDB ID      | Protein names                                      | Length(bp) | GC content (%) |
|----------------|----------------------------------------------------|------------|----------------|
| BCAM2806       | putative sugar ABC transporter ATP-binding protein | 1158       | 70.73          |
| BCAM2807       | putative beta-galactosidase                        | 1986       | 69.74          |
| BCAM2808       | putative extracellular solute-binding protein      | 1260       | 65.56          |
| BCAM2809       | putative ABC transporter system permease           | 873        | 66.09          |
| BCAM2810       | putative ABC transporter system permease           | 852        | 64.44          |
| BCAM2811       | hypothetical protein                               | 264        | 60.61          |
| BCAM2812       | LysR family regulatory protein                     | 945        | 64.76          |
| BCAM2813       | hypothetical protein                               | 405        | 62.72          |
| <b>Average</b> |                                                    | <b>968</b> | <b>65.58</b>   |
